# Supplementary material for: Automatic Training of Rat Cyborgs for Navigation
Source: Comput Intell Neurosci. 2016 Jun 29;2016:6459251. doi: 10.1155/2016/6459251 (PMC4942600; doi:10.1155/2016/6459251)
Supplement: Supplementary file 1 — Video S1 is a demo video of the automatic training in T1a, T1b, and T2. Video S2 is a demo video of the automatic training in navigation test. Table S1 presents the parameters of the parameterized state machines. Table S2 presents the experimental data of the automatic training by T03, DH06 and DH08 in T1a, T1b and T2. [file 6459251.f1.zip]

Archive with 6 entries (5 files):
- Supplementary Material/
- Supplementary Material/Ethical Approval Form in Chinese and English.pdf
- Supplementary Material/Table S1 Online_Parameters of state machine.xls
- Supplementary Material/Table S2 Online_Experimental data.xls
- Supplementary Material/Video S1 Online_T1a and T1b and T2.mp4
- Supplementary Material/Video S2 Online_Navigation test.mp4
