# Supplementary material for: Automatic Training of Rat Cyborgs for Navigation
Source: Comput Intell Neurosci. 2016 Jun 29;2016:6459251. doi: 10.1155/2016/6459251 (PMC4942600; doi:10.1155/2016/6459251)
Supplement: Supplementary file 1 — Video S1 is a demo video of the automatic training in T1a, T1b, and T2. Video S2 is a demo video of the automatic training in navigation test. Table S1 presents the parameters of the parameterized state machines. Table S2 presents the experimental data of the automatic training by T03, DH06 and DH08 in T1a, T1b and T2. [file 6459251.f1.zip › Supplementary Material/Table S1 Online_Parameters of state machine.xls]

## Sheet: Sheet1
						Table S1 online: parameters of state machine
						Parameters	Units	Value
						Max correct turns	readings	8
						Direction tolerance	degrees	45
						Max number of turn commands	readings	5
						Forward stimulus intervals	ms	400
						Turn stimulus intervals	ms	300
						Max training time for a trial	min	30
