# Supplementary material for: Automatic Training of Rat Cyborgs for Navigation
Source: Comput Intell Neurosci. 2016 Jun 29;2016:6459251. doi: 10.1155/2016/6459251 (PMC4942600; doi:10.1155/2016/6459251)
Supplement: Supplementary file 1 — Video S1 is a demo video of the automatic training in T1a, T1b, and T2. Video S2 is a demo video of the automatic training in navigation test. Table S1 presents the parameters of the parameterized state machines. Table S2 presents the experimental data of the automatic training by T03, DH06 and DH08 in T1a, T1b and T2. [file 6459251.f1.zip › Supplementary Material/Table S2 Online_Experimental data.xls]

## Sheet: Sheet1
Table S2 online: experimental data
Trial	T03				T03 Behavior			DH06				DH06 Behavior			DH08				DH08 Behavior
	Turns/Min.	Accuracy	MaxCorrect	Task	Immobility	Climbing	Grooming	Turns/Min.	Accuracy	MaxCorrect	Task	Immobility	Climbing	Grooming	Turns/Min.	Accuracy	MaxCorrect	Task	Immobility	Climbing	Grooming
1	24/30	7/24	3	L	0	10	1	83/30	42/83	4	R	1	0	1	9/4	8/9	8	L	0	0	0
2	35/30	23/35	6	L	0	2	0	67/30	31/67	4	R	0	0	1	58/30	3/58	2	R	1	0	1
3	22/30	6/22	1	L	2	2	5	51/21	22/51	8	R	0	0	0	85/30	3/85	1	R	0	1	2
4	33/18	17/33	8	L	2	3	2	21/30	3/21	2	L	3	0	0	58/30	6/58	1	R	3	0	4
5	94/30	7/94	3	R	0	14	3	11/30	2/11	1	L	2	2	2	28/30	8/28	2	R	1	0	2
6	103/30	45/103	4	R	0	17	2	18/30	10/18	4	L	1	0	2	37/30	11/37	2	R	4	0	4
7	74/30	35/74	4	R	0	15	3	24/30	8/24	2	L	1	1	0	30/30	15/30	4	R	1	0	4
8	25/11	15/25	8	R	0	6	2	31/30	12/31	3	L	1	0	3	24/30	8/24	2	R	1	2	4
9	36/30	18/36	4	LR	3	13	3	42/30	21/42	3	L	0	0	0	20/30	5/20	2	R	0	4	0
10	26/30	16/26	3	LR	0	5	2	39/30	24/39	7	L	0	0	1	33/30	12/33	2	R	0	4	3
11	30/30	14/30	3	LR	1	3	3	36/24	28/36	8	L	0	2	4	29/30	8/29	3	R	1	3	4
12	55/28	37/55	8	LR	1	25	2	25/30	16/25	5	LR	1	0	3	47/30	17/47	3	R	1	0	0
13								9/10	8/9	8	LR	0	0	2	31/30	22/31	8	R	0	3	6
14															15/24	10/15	8	LR	1	3	5
